# Supplementary material for: Towards Disentangling the Polygenic Contribution of Dyslexia to School Performance
Source: Research Square preprint supplement (doi:10.21203/rs.3.rs-7206327/v1), 2025-08-20
Supplement: Supplementary file 1 [file 9ffb4d176a5cda577600284a.docx]

**TOWARDS DISENTANGLING THE POLYGENIC CONTRIBUTION OF DYSLEXIA TO SCHOOL PERFORMANCE**

**Figure S1: Study design.** GWAS summary statistics on educational attainment (EA) 10 and dyslexia 6 were used to study the genetic overlap with MiXer between these traits. The genetic liability of dyslexia was dissected by its relationship with EA and with these genomic partitions we (i) ran genome-wide polygenic scores (PGS) on school performance and childhood psychopathology in our deeply phenotyped cohort of 4,274 school-aged children; (ii) performed mediation analysis to test the effect of the diagnosis of dyslexia in the associations between PGS and school performance and (iii) assessed partitioned heritability and annotation-stratified genetic covariance. The direction of effect of the alleles studied is represented in the figure as ‘+’ and ‘-‘.

PGS score

PGS score

Educational Attainment

**Figure S2: Contribution of genome-wide polygenic score of educational attainment (PGSEA)and dyslexia (PGSDYS)to school performance**. A) Density plots of the contribution of PGSEA and PGSDYS to school performance grades for the three subjects under study, being A: excellent performance, B: good performance, C: adequate performance and D: underperformance. B) Probability plots showing the probability of reaching each school performance grade (A, B, C or D) in each of the subjects. Per each subject we show the probability corresponding to each grade according to the PGSEA (blue) and PGSDYS (pink).

**Figure S3: Manhattan plots for the dyslexia (DYS) subsets of variants based on their relationship with educational attainment (EA).** Manhattan plots constructed from the GWAS summary statistics of dyslexia (Doust et al., 2022) considering (A) variants not associated with EA (PEA>0.05; DYS no EA) and (B) variants showing concordant and (C) discordant direction of the effect in DYS and EA. Blue line denotes genome-wide suggestive (P<1E-05) and red line denotes genome-wide significance (P < 5E-08).

**Figure S4: Contribution of genome-wide polygenic score for dyslexia (PGSDYS) by its relationship with educational attainment (EA) to school performance**. A) Density plots of the contribution of the PGSDYS according to the four partitions described previously to school performance grades for the three subjects under study, being A: excellent performance, B: good performance, C: adequate performance and D: underperformance. B) Probability plots showing the probability of reaching each school performance grade (A, B, C or D) in each of the subjects. Per each subject we show the probability corresponding to each grade according to the PGSDYSconcordant (blue) and PGSDYSdiscordant (pink).

**Figure S5: Mediation analysis of the dyslexia diagnosis on the relationship between genome-wide polygenic scores (PGS) for dyslexia and school performance**. The associations performed are represented by arrows with the corresponding effect (β) and P-value (P). The effect of each PGS on the dyslexia diagnosis is shown in blue and the effect of the dyslexia diagnosis on school performance in yellow. The total effect of the PGS on school performance is shown in green and the direct effect of the PGS on school performance left when considering the dyslexia diagnosis is shown in orange. The observed effect reduction is calculated as (total effect - direct effect) / total effect *100.
