# Supplementary material for: Towards Disentangling the Polygenic Contribution of Dyslexia to School Performance
Source: Research Square preprint supplement (doi:10.21203/rs.3.rs-7206327/v1), 2025-08-20
Supplement: Supplementary file 2 [file cce37684ffb88f0acc31140d.xlsx]

## Sheet: S1
Table 1: GWAS summary statistics used in the annotation stratified covariance analysis
Domain	Trait	Description	Sample size*	Reference
Cognition and language ability	Word reading	Number of correct words read aloud from a list in a time-restricted or unrestricted fashion.	N = 27,180	Eising et al., 2022
	Nonword reading	Number of nonwords (group of phonemes that look or sound like a word, obeys the phonotactic rules of the language, but has no meaning) read aloud correctly from a list in a time-restricted or unrestricted fashion.	N = 16,746	Eising et al., 2022
	Nonword repetition	Number of nonwords or phonemes repeated aloud correctly.	N = 12,828	Eising et al., 2022
	Spelling	Number of words correctly spelled orally or in writing after being dictated as single words or in a sentence.	N = 17,278	Eising et al., 2022
	Phoneme awareness	Number of words correctly altered in phoneme deletion/elision and spoonerism tasks.	N = 12,411	Eising et al., 2022
	Intelligence quotient	Intelligence was assessed using various neurocognitive tests, primarily gauging fluid domains of cognitive functioning.	N = 269,867	Savage et al., 2018
	Performance IQ	Measure of an individual's overall visuospatial intellectual abilities. Measure of fluid reasoning, spatial processing, attentiveness to details, and visual-motor integration.	N = 18,722	Eising et al., 2022
	Fluid Intelligence Score	Reasoning ability, and the ability to generate, transform, and manipulate different types of novel information in real-time.	N = 117,131	UKBB**
	Ambidexterity	Ambidexterity is the ability to use both the right and left hand equally well.	Neff = 23,933	UKBB**
Psychiatric disorders	Attention deficit/hyperactivity disorder	ADHD is a neurodevelopmental disorder characterized by extensive hyperactive, impulsive and/or inattentive behaviors that impair daily functioning.	Neff = 128,213	Demontis et al., 2023
	Major depression	Major depression is a debilitating psychiatric illness (leading cause of worldwide disability) and is typically associated with low mood and anhedonia.	Neff = 449,856	Howard et al., 2019
	Anorexia nervosa	Anorexia nervosa is characterized by self-starvation and weight loss resulting in low weight for height and age. Body mass index or BMI, a measure of weight for height, is typically under 18.5 in an adult individual with anorexia nervosa.	Neff = 52,042	Watson et al., 2019
	Anxiety disorder	Generalized anxiety disorder involves persistent and excessive worry that interferes with daily activities. This ongoing worry and tension may be accompanied by physical symptoms, such as restlessness, feeling on edge or easily fatigued, difficulty concentrating, muscle tension or problems sleeping. Self-reported question from the UKBB: “Have you been diagnosed with the following mental health pr…	Neff = 57,412	UKBB**
	Autism spectrum disorder	ASD is the term for a group of pervasive neurodevelopmental disorders characterized by impaired social and communication skills along with repetitive and restrictive behavior. The clinical presentation is highly heterogeneous, including individuals with severe impairment and intellectual disability (ID) as well as individuals with above-average intelligence quotient (IQ) and high levels of academ…	Neff = 44,368	Grove et al., 2019
	Schizophrenia	Schizophrenia is a severe, chronic mental disorder characterized by disturbances in thought, perception and behavior.	Neff = 233,471	Trubetskoy et al., 2022
	Bipolar disorder	Bipolar disorder (BD) is a complex mental disorder characterized by recurrent episodes of (hypo)mania and depression.	Neff = 150,670	Mullins et al., 2021
Substance use	Addiction factor	Substance use disorder (SUD) is a condition in which there is uncontrolled use of a substance despite harmful consequences, using a certain substance(s) such as alcohol, tobacco, or other psychoactive substances, to the point where their ability to function in day-to-day life becomes impaired. Addiction factor was used as a proxy of SUD.	N = 647,703	Hatoum et al., 2023
	Alcohol use	Alcohol consumption was determined using the items 1-3 (often termed AUDIT-C) from the Alcohol Use Disorders Identification Test (AUDIT) is a screening tool designed to identify hazardous alcohol use in the past year.	N = 121,604	Sanchez-Roige et al., 2019
	Lifetime cannabis use	Cannabis is a widely used psychoactive substance, and its use is associated with various adverse mental health outcomes. Lifetime cannabis use is defined as any use of cannabis during lifetime.	Neff = 127,078	Pasman et al. 2018
Wellbeing and socio-economical status	Subjective wellbeing	Subjective well-being is measured by survey questions on life satisfaction, positive affect, or happiness.	N = 2,370,390	Baselmans et al., 2019
	Sleeplessness/insomnia	Insomnia is a sleep disorder in which you have trouble falling and/or staying asleep. The condition can be short-term (acute) or can last a long time (chronic). Self-reported question from the UKBB: “Do you have trouble falling asleep at night or do you wake up in the middle of the night?" If this varies a lot, answer this question in relation to the last 4 weeks.	N = 360,738	UKBB**
	Loneliness/isolation	Loneliness is a universal human experience that corresponds to an aversive response to a discrepancy between a people’s desired and perceived level of social connectedness. This phenotype involves both objective and perceived social isolation. Self-reported question from the UKBB: "Do you often feel lonely?"	Neff = 208,661	UKBB**
	General risk tolerance	Willingness to take risks, typically to obtain some reward. It varies substantially across humans and has been actively studied in the behavioral and social sciences.	N = 466,571	Linnér et al., 2019
	Household income	Self-reported household income was collected using a 5-point scale corresponding to the total household income before tax, 1 being less than £18,000, 2 being £18,000–£29,999, 3 being £30,000–£51,999, 4 being £52,000–£100,000 and 5 being greater than £100,000. This 5-point scale was analyzed by treating the categories of income as a continuous variable.	N = 505,541	Hill et al., 2019
* The sample size in dichotomic traits was calculated as Neffective= 4/(1/Ncases + 1/Ncontrols)
** UK BioBank summary statistics can be downloaded through the Ben Neale lab webpage: http://www.nealelab.is/uk-biobank

## Sheet: S2
Table 2: SNP-based heritability and genetic correlation of dyslexia and educational attainment .
	h2SNP (se)*	Intercept (se)	Genetic Correlation (se)	Z-score	P-value
Dyslexia	0.179 (0.0071)	1.047 (0.0117)	-0.1857 (0.019)	-9.7554	1.7496e-22
Educational Attainment	0.102 (0.0023)	1.101 (0.0171)
* h2SNP for dyslexia corresponds to SNP-based heritability in the liability scale considering a prevalence of 10%.

## Sheet: S3
Table 3: Genetic overlap between dyslexia and educational attainment from MiXeR, univariate and bivariate analyses.
	Univariate				Bivariate
Traits	Number of trait-specific variants (at 90% heritability)		AIC		Number of shared variants (at 90% heritability)		Dice Coefficient		Concordant fraction		AIC (Best model vs. minimum polygenic overlap)	AIC (Best model vs. maximum polygenic overlap)
	Mean	SD			Mean	SD	Mean	Std	Mean	Std
Dyslexia	10315.8	464.865	177.008		10214.5	465.19	0.826	0.025	0.419	0.004	123.994	-0.078
Educational attainment	14403.5	264.565	1389.27
AIC: Akaike Information Criterion. AIC Best model vs. minimum or maximum polygenic overlap indicates if MiXeR can accurately distinguish the reported overlap from the minimum or maximum possible overlap allowed. Positive values indicates that the best model fits the data better than the minimum or maximum model.

## Sheet: S4
Table 4: Genome-wide polygenic scores (PGS) comparisons across ranked quintiles for educational attainment (EA) and dyslexia (DYS) on school performance.
				EA			DYS
Subject		PGS quintile		OR (95% CI)	P-value		OR (95% CI)	P-value
First Language		2		1.43 (1.18-1.72)	0.000189858		0.75 (0.62-0.9)	0.00190073
		3		1.55 (1.28-1.87)	6.18802e-06		0.68 (0.56-0.82)	6.50496e-05
		4		1.78 (1.46-2.17)	1.44879e-08		0.62 (0.51-0.75)	4.27889e-07
		5		2.50 (2.02-3.10)	5.96495e-17		0.51 (0.43-0.62)	5.18537e-12
Foreign Language		2		1.35 (1.12-1.63)	0.00136339		0.71 (0.60-0.85)	0.000243324
		3		1.58 (1.31-1.90)	2.0798e-06		0.68 (0.57-0.82)	3.16693e-05
		4		1.80 (1.48-2.19)	4.04498e-09		0.65 (0.54-0.78)	2.64834e-06
		5		2.3 (1.87-2.84)	6.31999e-15		0.51 (0.43-0.62)	1.36154e-12
Mathematics		2		1.57 (1.31-1.89)	1.43312e-06		0.78 (0.65-0.93)	0.0067323
		3		1.81 (1.50-2.18)	5.05517e-10		0.82 (0.69-0.98)	0.0323358
		4		1.98 (1.63-2.41)	6.16514e-12		0.81 (0.68-0.97)	0.0247029
		5		2.81 (2.28-3.47)	3.79958e-22		0.66 (0.55-0.79)	7.66966e-06
Significant associations are shown in bold. OR = odds ratio; 95% CI = 95% confidence interval

## Sheet: S5
Table 5A: SNP-based partitioned heritability (h2SNP) of dyslexia (DYS) sets of variants by their relationship with educational attainment (EA).
Set	Proportion SNPs	Proportion h2SNP	Proportion h2SNP SE	Enrichment	Enrichment SE	Enrichment P-value
DYS no EA	0.7084	0.5508	0.0223	0.7774	0.0315	1.71e-11
DYS concordant	0.0926	0.1012	0.0132	1.0925	0.1424	0.5146
DYS discordant	0.1678	0.2912	0.0183	1.7353	0.1091	1.19e-10
Table 5B: Enrichment of dyslexia (DYS) genome-wide significant hits in the different SNP partitions.
Set	N SNPs	N significant SNPs	c2 Statistic	P-value
DYS	6429800	6602	-	-
DYS no EA	5004441	2926	659.03	2.43e-145
DYS concordant	636190	529	21.661	3.25e-06
DYS discordant	789169	3147	4544.4	0

## Sheet: S6
Table 6: Genome-wide polygenic scores (PGS) comparisons across ranked quintiles for dyslexia (DYS) by their relationship with educational attainment (EA) on school performance
				DYS no EA			DYS – EA			DYS concordant			DYS discordant
Subject		PGS quintile		OR (95% CI)	P-value		OR (95% CI)	P-value		OR (95% CI)	P-value		OR (95% CI)	P-value
First Language		2		0.88 (0.73-1.06)	0.182448		0.89 (0.74-1.07)	0.19916		0.88 (0.73-1.06)	0.167188		0.81 (0.67-0.98)	0.0269898
		3		0.77 (0.64-0.92)	0.00494012		0.79 (0.66-0.95)	0.0131819		1.13 (0.94-1.37)	0.18316		0.70 (0.58-0.85)	0.00025448
		4		0.66 (0.55-0.79)	1.08417e-05		0.66 (0.55-0.80)	1.22989e-05		0.94 (0.78-1.14)	0.543309		0.61 (0.50-0.74)	3.50472e-07
		5		0.64 (0.53-0.77)	2.35617e-06		0.61 (0.50-0.73)	2.22594e-07		1.19 (0.98-1.44)	0.0773124		0.45 (0.37-0.55)	3.11482e-15
Foreign Language		2		0.77 (0.64-0.92)	0.00377938		0.89 (0.75-1.07)	0.219871		0.93 (0.78-1.12)	0.460511		0.78 (0.65-0.93)	0.00696079
		3		0.75 (0.62-0.89)	0.0014756		0.80 (0.67-0.96)	0.0157415		1.08 (0.90-1.30)	0.382452		0.76 (0.63-0.91)	0.00278003
		4		0.72 (0.61-0.87)	0.000450363		0.72 (0.60-0.86)	0.000273366		0.96 (0.80-1.16)	0.682063		0.62 (0.52-0.75)	3.82911e-07
		5		0.62 (0.52-0.74)	1.83034e-07		0.60 (0.50-0.72)	2.97286e-08		1.17 (0.97-1.41)	0.107919		0.48 (0.39-0.58)	3.50782e-14
Mathematics		2		0.89 (0.75-1.07)	0.21863		0.91 (0.76-1.09)	0.316781		0.97 (0.81-1.16)	0.713952		0.80 (0.67-0.96)	0.0157025
		3		0.92 (0.77-1.10)	0.38294		0.79 (0.66-0.94)	0.00917882		1.18 (0.98-1.41)	0.0744786		0.78 (0.65-0.94)	0.00860862
		4		0.90 (0.75-1.07)	0.233122		0.77 (0.65-0.93)	0.00525482		1.06 (0.88-1.27)	0.550888		0.65 (0.54-0.79)	6.05512e-06
		5		0.83 (0.70-0.99)	0.0430281		0.70 (0.59-0.84)	0.000116679		1.26 (1.04-1.52)	0.0156317		0.53 (0.44-0.64)	4.3949e-11
Significant associations are shown in bold. OR = odds ratio; 95% CI = 95% confidence interval

## Sheet: S7
Table 7: Analyses of the genome-wide polygenic scores (PGS) for dyslexia (DYS) dissected by its relationship with educational attainment (EA) on school performance stratified by sex.
		Boys (n= 2406)				Girls (n= 1868)				Interaction P-value
Subject	PGS	OR	Statistic	P-value		OR	Statistic	P-value
First Language	DYS no EA	0.83	-4.88	1.08e-06		0.86	-3.17	0.0015		0.4842
	DYS concordant	1.07	1.61	0.107		1.07	1.35	0.177		0.9068
	DYS discordant	0.73	-7.85	4.08e-15		0.73	-6.58	4.8e-11		0.8206
Foreign Language	DYS no EA	0.85	-4.12	3.75e-05		0.83	-3.97	7.26e-05		0.8028
	DYS concordant	1.08	1.97	0.0485		0.99	-0.17	0.8651		0.2831
	DYS discordant	0.76	-6.84	7.84e-12		0.74	-6.27	3.6e-10		0.6897
Mathematics	DYS no EA	0.93	-1.86	0.0626		0.96	-0.9	0.3698		0.5974
	DYS concordant	1.1	2.42	0.0154		1.11	2.38	0.0174		0.8022
	DYS discordant	0.8	-5.66	1.51e-08		0.74	-6.43	1.26e-10		0.3578
Significant associations (P < 0.05) are shown in bold. OR = odds ratio

## Sheet: S8
Table 8A: Estimation of the effect of genome-wide polygenic scores (PGS) for dyslexia (DYS) on the dyslexia diagnosis.
Mediator	PGS	OR (95% CI)	Statistic	P-value
DYS diagnosis	DYS no EA	1.21 (1.09-1.34)	3.594	0.000326
	DYS concordant	1.06 (0.96-1.19)	1.181	0.2377
	DYS discordant	1.39 (1.24-1.55)	5.874	4.25e-09
Table 8B: Estimation of the effect of the dyslexia (DYS) diagnosis on school performance in mathematics, foreign language and primary language.
Mediator	Subject	OR (95% CI)	Statistic	P-value
DYS diagnosis	First Language	0.18 (0.14-0.21)	-16.905	4.16e-64
	Foreign Language	0.19 (0.15-0.23)	-15.513	2.81e-54
	Mathematics	0.26 (0.21-0.31)	-13.185	1.07e-39
Table 8C: Results of the mediation analysis showing the total and direct effects, when accounting for the dyslexia (DYS) diagnosis, of PGSDYSnoEA in school performance.
Subject		PGS	OR (95% CI)	Effect	Statistic	P-value	Effect reduction
First Language	Total effect	DYS no EA	0.84 (0.79-0.89)	-0.176	-5.887	3.94e-09	0.122
	Direct effect	DYS no EA	0.86 (0.81-0.91)	-0.154	-5.113	3.17e-07
		dyslexia diagnosis	0.18 (0.15-0.22)		-16.669	2.2e-62
Foreign Language	Total effect	DYS no EA	0.85 (0.80-0.90)	-0.165	-5.623	1.88e-08	0.1285
	Direct effect	DYS no EA	0.87 (0.82-0.92)	-0.144	-4.872	1.11e-06
		dyslexia diagnosis	0.19 (0.15-0.24)		-15.287	9.37e-53
Table 8D: Results of the mediation analysis showing the total and direct effects, when accounting for the dyslexia (DYS) diagnosis, of PGSDYSdiscordant in school performance.
Subject		PGS	OR (95% CI)	Effect	Statistic	P-value	Effect reduction
First Language	Total effect	DYS discordant	0.73 (0.69-0.78)	-0.31	-10.024	1.2e-23	0.1044
	Direct effect	DYS discordant	0.76 (0.71-0.81)	-0.277	-8.894	5.87e-19
		dyslexia diagnosis	0.19 (0.15-0.23)		-16.286	1.25e-59
Foreign Language	Total effect	DYS discordant	0.76 (0.72-0.81)	-0.276	-9.124	7.27e-20	0.1291
	Direct effect	DYS discordant	0.79 (0.74-0.83)	-0.24	-7.899	2.8e-15
		dyslexia diagnosis	0.20 (0.16-0.25)		-14.883	4.26e-50
Mathematics	Total effect	DYS discordant	0.78 (0.74-0.83)	-0.245	-8.259	1.47e-16	0.1214
	Direct effect	DYS discordant	0.81 (0.76-0.86)	-0.215	-7.213	5.48e-13
		dyslexia diagnosis	0.27 (0.22-0.33)		-12.579	2.76e-36
OR = odds ratio; 95% CI = 95% confidence interval

## Sheet: S9
Table 9: Analysis of the associations between genome-wide polygenic scores (PGS) for educational attainment (EA), dyslexia (DYS) and dyslexia dissected by its relationship with educational attainment and childhood psychopathology (N = 4084).
			PGSEA					PGSDYS
Scales			Beta	SE	Stat	adj P-value		Beta	SE	Stat	adj P-value
Child Behavior Checklist
	Withdrawn/Depressed		-0.01	0.01	-0.72	0.5388		-0.02	0.01	-1.57	0.1977
	Somatic Complaints		-0.02	0.01	-1.45	0.2427		0.042	0.01	3.28	0.00391
	Anxiety/Depression		-0.028	0.02	-1.83	0.1531		0.014	0.01	1.01	0.4298
	Social Problems		-0.026	0.01	-1.74	0.167		0.051	0.01	3.67	0.0013
	Thought Problems		-0.006	0.01	-0.44	0.7071		0.011	0.01	0.85	0.5144
	Attention Problems		-0.109	0.02	-7.16	3.95e-11		0.072	0.01	5.1	5.56e-06
	Rule-Breaking Behavior		-0.057	0.01	-4.45	8.35e-05		0.019	0.01	1.6	0.1955
	Aggressive Behavior		-0.062	0.02	-3.27	0.00391		0.035	0.02	1.96	0.119
			PGSDYSnoEA					PGSDYSconcordant					PGSDYSdiscordant
Scales			Beta	SE	Stat	adj P-value		Beta	SE	Stat	adj P-value		Beta	SE	Stat	adj P-value
Child Behavior Checklist
	Withdrawn/Depressed		-0.022	0.01	-1.72	0.167		-0.017	0.01	-1.34	0.2896		-0.001	0.01	-0.04	0.984
	Somatic Complaints		0.032	0.01	2.47	0.0387		0.01	0.01	0.75	0.5316		0.04	0.01	3.02	0.00749
	Anxiety/Depression		0.011	0.01	0.78	0.5316		-0.009	0.01	-0.63	0.5781		0.026	0.01	1.81	0.1531
	Social Problems		0.044	0.01	3.12	0.00584		0	0.01	-0.02	0.984		0.057	0.01	3.98	0.000484
	Thought Problems		0.009	0.01	0.68	0.5522		0.001	0.01	0.11	0.9481		0.011	0.01	0.81	0.5271
	Attention Problems		0.057	0.01	3.97	0.000484		-0.019	0.01	-1.3	0.2991		0.089	0.01	6.13	2.12e-08
	Rule-Breaking Behavior		0.009	0.01	0.75	0.5316		-0.021	0.01	-1.71	0.167		0.046	0.01	3.8	0.000881
	Aggressive Behavior		0.03	0.02	1.67	0.1768		-0.02	0.02	-1.11	0.4034		0.062	0.02	3.4	0.00298
FDR-corrected significant associations (adj P-value < 0.05) are shown in bold. SE = standard error; Stat = statistic.

## Sheet: S10
Supplementary Table S10. Results of annotation-stratified genetic covariance between dyslexia (DYS), educational attainment (EA) and psychiatric and behavioral traits
Group	Phenotype	Set	rho	rho corrected	SE rho	pvalue	pvalue corrected	Significant
Cognition and language ability	Nonword reading	EA	0.088314	0.0900298	0.00547063	1.27e-58	7.48e-61	*
	Nonword reading	DYS_All_SNPs	-0.146148	-0.153729	0.00938901	1.24e-54	2.97e-60	*
	Nonword reading	DYSnoEA	-0.0954071	-0.102376	0.00936017	2.13e-24	7.64e-28	*
	Nonword reading	DYSdiscordant	-0.0812155	-0.0822342	0.00571722	8.48e-46	6.56e-47	*
	Nonword reading	DYSconcordant	0.0154263	0.0148793	0.00353792	1.3e-05	2.6e-05	*
	Spelling	EA	0.097055	0.0950251	0.00606902	1.46e-57	2.96e-55	*
	Spelling	DYS_All_SNPs	-0.157394	-0.16148	0.00908318	2.89e-67	1.05e-70	*
	Spelling	DYSnoEA	-0.103077	-0.106833	0.00946744	1.32e-27	1.57e-29	*
	Spelling	DYSdiscordant	-0.0881952	-0.0887446	0.00623554	2.03e-45	5.79e-46	*
	Spelling	DYSconcordant	0.016874	0.016579	0.0033822	6.07e-07	9.49e-07	*
	Word reading	EA	0.103195	0.101341	0.00475031	1.22e-104	5.53e-101	*
	Word reading	DYS_All_SNPs	-0.133322	-0.134037	0.00781412	2.86e-65	5.96e-66	*
	Word reading	DYSnoEA	-0.0872064	-0.0878636	0.00827411	5.67e-26	2.43e-26	*
	Word reading	DYSdiscordant	-0.0816303	-0.0817263	0.00516806	3.36e-56	2.5e-56	*
	Word reading	DYSconcordant	0.0231824	0.0231309	0.0032297	7.08e-13	7.95e-13	*
	Phoneme awareness	EA	0.0867493	0.0862828	0.00622827	4.26e-44	1.21e-43	*
	Phoneme awareness	DYS_All_SNPs	-0.133191	-0.132042	0.00988381	2.17e-41	1.04e-40	*
	Phoneme awareness	DYSnoEA	-0.0888757	-0.0878193	0.010544	3.48e-17	8.16e-17	*
	Phoneme awareness	DYSdiscordant	-0.0752214	-0.0750668	0.00708864	2.63e-26	3.33e-26	*
	Phoneme awareness	DYSconcordant	0.014332	0.0144151	0.00448499	0.0014	0.00131	*
	Nonword repetition	EA	0.0599063	0.0559579	0.00486597	7.88e-35	1.32e-30	*
	Nonword repetition	DYS_All_SNPs	-0.056484	-0.0552942	0.00739409	2.19e-14	7.54e-14	*
	Nonword repetition	DYSnoEA	-0.035728	-0.0346345	0.00777976	4.38e-06	8.51e-06	*
	Nonword repetition	DYSdiscordant	-0.0406448	-0.0404848	0.00408817	2.73e-23	4.04e-23	*
	Nonword repetition	DYSconcordant	0.0163791	0.0164651	0.00340844	1.54e-06	1.36e-06	*
	Performance IQ	EA	0.0908306	0.0902873	0.00519666	2.08e-68	1.3e-67	*
	Performance IQ	DYS_All_SNPs	-0.0214609	-0.034723	0.00729388	0.00326	1.93e-06	*
	Performance IQ	DYSnoEA	-0.0105229	-0.0227134	0.00748994	0.16	0.00243	*
	Performance IQ	DYSdiscordant	-0.0545797	-0.0563616	0.00567645	6.9e-22	3.11e-23	*
	Performance IQ	DYSconcordant	0.0383725	0.0374158	0.00337867	6.82e-30	1.68e-28	*
	Fluid intelligence score	EA	0.135093	0.117708	0.00514374	5.01e-152	6.75e-116	*
	Fluid intelligence score	DYS_All_SNPs	-0.0997678	-0.101393	0.0058972	3.33e-64	2.98e-66	*
	Fluid intelligence score	DYSnoEA	-0.0605296	-0.0620229	0.00561422	4.21e-27	2.25e-28	*
	Fluid intelligence score	DYSdiscordant	-0.0913475	-0.0915656	0.00488063	3.64e-78	1.57e-78	*
	Fluid intelligence score	DYSconcordant	0.0437957	0.0436787	0.00185607	4.24e-123	1.88e-122	*
	Inteligence Quotient	EA	0.0876921	0.0716767	0.0040705	6.12e-103	2.11e-69	*
	Inteligence Quotient	DYS_All_SNPs	-0.0643921	-0.0584465	0.00396716	3.03e-59	3.98e-49	*
	Inteligence Quotient	DYSnoEA	-0.0381732	-0.0329802	0.00386839	5.73e-23	1.52e-17	*
	Inteligence Quotient	DYSdiscordant	-0.0634033	-0.0624667	0.00343601	4.97e-76	7.43e-74	*
	Inteligence Quotient	DYSconcordant	0.0296658	0.03019	0.0011608	4.67e-144	4.03e-149	*
	Ambidexterity	EA	-0.00910688	-0.0114213	0.00333471	0.00632	0.000615	*
	Ambidexterity	DYS_All_SNPs	0.0345201	0.0439516	0.00565413	1.03e-09	7.64e-15	*
	Ambidexterity	DYSnoEA	0.0194632	0.0281299	0.00600999	0.0012	2.86e-06	*
	Ambidexterity	DYSdiscordant	0.0136921	0.014958	0.00367996	0.000199	4.81e-05	*
	Ambidexterity	DYSconcordant	0.00381532	0.00449438	0.00271224	0.16	0.0975
Psychiatric disorders	Schizophrenia	EA	0.000720508	0.00135002	0.00249283	0.773	0.588
	Schizophrenia	DYS_All_SNPs	0.0111034	0.0142554	0.00395197	0.00496	0.00031	*
	Schizophrenia	DYSnoEA	0.00608858	0.00897812	0.00412402	0.14	0.0295	*
	Schizophrenia	DYSdiscordant	0.00269824	0.00312354	0.00253621	0.287	0.218
	Schizophrenia	DYSconcordant	0.00215745	0.00238897	0.00196725	0.273	0.225
	Major depression	EA	-0.020865	-0.0200316	0.00196381	2.29e-26	1.98e-24	*
	Major depression	DYS_All_SNPs	0.0140015	0.0171396	0.0021288	4.79e-11	8.19e-16	*
	Major depression	DYSnoEA	0.00950074	0.0123835	0.0021923	1.47e-05	1.62e-08	*
	Major depression	DYSdiscordant	0.0137082	0.0141298	0.00145443	4.3e-21	2.6e-22	*
	Major depression	DYSconcordant	-0.00782618	-0.00759986	0.00117021	2.27e-11	8.34e-11	*
	Bipolar disorder	EA	0.0134948	0.0116917	0.0025994	2.09e-07	6.86e-06	*
	Bipolar disorder	DYS_All_SNPs	0.0166135	0.0235773	0.00426528	9.82e-05	3.24e-08	*
	Bipolar disorder	DYSnoEA	0.0131776	0.0195529	0.00420462	0.00172	3.31e-06	*
	Bipolar disorder	DYSdiscordant	-0.00478252	-0.0038398	0.00258616	0.0644	0.138
	Bipolar disorder	DYSconcordant	0.00996258	0.0104782	0.00208339	1.74e-06	4.92e-07	*
	Autism spectrum disorder	EA	0.0269535	0.0301201	0.00346314	7.08e-15	3.4e-18	*
	Autism spectrum disorder	DYS_All_SNPs	0.0213082	0.0140994	0.00515069	3.52e-05	0.00619	*
	Autism spectrum disorder	DYSnoEA	0.0175488	0.0110065	0.00611869	0.00413	0.072
	Autism spectrum disorder	DYSdiscordant	-0.00872299	-0.00973318	0.00357256	0.0146	0.00644	*
	Autism spectrum disorder	DYSconcordant	0.0162834	0.0157224	0.00251908	1.02e-10	4.34e-10	*
	Attention deficit/hyperactivity disorder	EA	-0.0783369	-0.0750962	0.00335171	8.2e-121	3.49e-111	*
	Attention deficit/hyperactivity disorder	DYS_All_SNPs	0.0695898	0.0671754	0.00423176	9.16e-61	9.58e-57	*
	Attention deficit/hyperactivity disorder	DYSnoEA	0.0494725	0.0472677	0.00422624	1.19e-31	4.86e-29	*
	Attention deficit/hyperactivity disorder	DYSdiscordant	0.0568521	0.0565235	0.00335336	1.8e-64	9.51e-64	*
	Attention deficit/hyperactivity disorder	DYSconcordant	-0.0289072	-0.0290895	0.00182983	3.23e-56	6.61e-57	*
	Anxiety disorder	EA	-0.016044	-0.0129165	0.00321821	6.18e-07	5.98e-05	*
	Anxiety disorder	DYS_All_SNPs	0.00118543	-0.000558456	0.00389474	0.761	0.886
	Anxiety disorder	DYSnoEA	-0.00260949	-0.00421196	0.00446419	0.559	0.345
	Anxiety disorder	DYSdiscordant	0.00755181	0.00731775	0.00251664	0.00269	0.00364	*
	Anxiety disorder	DYSconcordant	-0.00582316	-0.00594872	0.00229104	0.011	0.00942	*
	Anorexia nervosa	EA	0.0370634	0.0382679	0.00395893	7.83e-21	4.2e-22	*
	Anorexia nervosa	DYS_All_SNPs	-0.0131031	-0.0111729	0.00459759	0.00437	0.0151	*
	Anorexia nervosa	DYSnoEA	-0.00744303	-0.00570442	0.00492551	0.131	0.247
	Anorexia nervosa	DYSdiscordant	-0.0230518	-0.0227771	0.00342114	1.61e-11	2.78e-11	*
	Anorexia nervosa	DYSconcordant	0.0144081	0.0145613	0.00238327	1.49e-09	9.98e-10	*
Substance use	Addiction factor	EA	-0.0182716	-0.0161544	0.00102681	7.79e-71	9.04e-56	*
	Addiction factor	DYS_All_SNPs	0.00420657	0.00373355	0.00143892	0.00346	0.00947	*
	Addiction factor	DYSnoEA	0.00338678	0.00296023	0.00134624	0.0119	0.0279	*
	Addiction factor	DYSdiscordant	0.00936026	0.00929479	0.000941906	2.86e-23	5.73e-23	*
	Addiction factor	DYSconcordant	-0.00802498	-0.00806075	0.000743182	3.51e-27	2.08e-27	*
	Lifetime cannabis use	EA	0.0375935	0.0319928	0.00232868	1.26e-58	5.96e-43	*
	Lifetime cannabis use	DYSnoEA	0.00317897	-2.32e-05	0.00350259	0.364086	0.994718
	Lifetime cannabis use	DYSdiscordant	-0.0174364	-0.017904	0.00256207	1.01e-11	2.79e-12	*
	Lifetime cannabis use	DYSconcordant	0.0162043	0.0159537	0.00204524	2.32e-15	6.17e-15	*
	Lifetime cannabis use	DYS_All_SNPs	0.00117683	-0.00230809	0.00347852	0.735127	0.506994
	Alcohol use	EA	0.0246552	0.0197007	0.00244503	6.51e-24	7.79e-16	*
	Alcohol use	DYSnoEA	-0.0104847	-0.0098733	0.00321447	0.00110735	0.00212977	*
	Alcohol use	DYSdiscordant	-0.0136598	-0.0135703	0.00221644	7.14e-10	9.21e-10	*
	Alcohol use	DYSconcordant	0.00950845	0.00955637	0.00208113	4.9e-06	4.39e-06	*
	Alcohol use	DYS_All_SNPs	-0.0138947	-0.0132294	0.0031575	1.08e-05	2.79e-05	*
Wellbeing and SES	General risk tolerance	EA	0.00382624	-0.00219737	0.00165044	0.0204	0.183
	General risk tolerance	DYS_All_SNPs	0.0298104	0.0315148	0.00234459	4.91e-37	3.45e-41	*
	General risk tolerance	DYSnoEA	0.0201949	0.0217613	0.00279261	4.78e-13	6.57e-15	*
	General risk tolerance	DYSdiscordant	0.00721254	0.00744131	0.00193678	0.000196	0.000122	*
	General risk tolerance	DYSconcordant	0.00560491	0.00572763	0.00117275	1.76e-06	1.04e-06	*
	Sleeplessness/insomnia	EA	-0.029402	-0.0258733	0.00191345	2.77e-53	1.16e-41	*
	Sleeplessness/insomnia	DYS_All_SNPs	0.0108278	0.0164668	0.00231535	2.92e-06	1.14e-12	*
	Sleeplessness/insomnia	DYSnoEA	0.00713049	0.0123123	0.0023097	0.00202	9.78e-08	*
	Sleeplessness/insomnia	DYSdiscordant	0.0170078	0.0177647	0.00161632	6.8e-26	4.23e-28	*
	Sleeplessness/insomnia	DYSconcordant	-0.0121832	-0.0117771	0.0011432	1.62e-26	6.91e-25	*
	Subjective wellbeing	EA	0.00956514	0.00753564	0.000973595	8.83e-23	9.94e-15	*
	Subjective wellbeing	DYS_All_SNPs	-0.00388037	-0.00537465	0.00113076	0.0006	2e-06	*
	Subjective wellbeing	DYSnoEA	-0.00304102	-0.00439348	0.00123321	0.0137	0.000367	*
	Subjective wellbeing	DYSdiscordant	-0.00536484	-0.00557436	0.000774879	4.41e-12	6.3e-13	*
	Subjective wellbeing	DYSconcordant	0.00402221	0.0039021	0.000569754	1.67e-12	7.45e-12	*
	Loneliness/isolation	EA	-0.0364386	-0.0321855	0.00227087	6.09e-58	1.34e-45	*
	Loneliness/isolation	DYS_All_SNPs	0.02175	0.0258322	0.00283174	1.58e-14	7.35e-20	*
	Loneliness/isolation	DYSnoEA	0.0133514	0.0171026	0.00276313	1.35e-06	6.03e-10	*
	Loneliness/isolation	DYSdiscordant	0.0227386	0.0232865	0.00195585	3.04e-31	1.1e-32	*
	Loneliness/isolation	DYSconcordant	-0.0123449	-0.0120509	0.00150096	1.96e-16	9.84e-16	*
	Household income	EA	0.129133	0.100523	0.00391149	5.16e-239	1.19e-145	*
	Household income	DYS_All_SNPs	-0.0245205	-0.0273284	0.00258384	2.31e-21	3.82e-26	*
	Household income	DYSnoEA	-0.013252	-0.0158311	0.00239094	2.98e-08	3.56e-11	*
	Household income	DYSdiscordant	-0.0674645	-0.0678426	0.00310124	6.33e-105	4.4e-106	*
	Household income	DYSconcordant	0.05348	0.0532764	0.00124552	0	0	*
rho: genetic covariance estimate; rho corrected: genetic covariance estimate with sample overlap correction; p-value corrected: p-value from the statistical test for genetic covariance with sample overlap correction. * significant results after False Discovery Rate multiple testing correction.
